# Supplementary material for: AGBL4 promotes malignant progression of glioblastoma via modulation of MMP-1 and inflammatory pathways
Source: Front Immunol. 2024 Jun 28;15:1420182. doi: 10.3389/fimmu.2024.1420182 (PMC11246717; doi:10.3389/fimmu.2024.1420182)
Supplement: Supplementary file 2 [file Table_1.xls]

geneID	length	A172-NC.rawreads	A172-NC.FPKM	A172-NC-1.rawreads	A172-NC-1.FPKM	A172-NC-2.rawreads	A172-NC-2.FPKM	A172-KD4.rawreads	A172-KD4.FPKM	A172-KD4-1.rawreads	A172-KD4-1.FPKM	A172-KD4-2.rawreads	A172-KD4-2.FPKM	baseMean	log2FoldChange	lfcSE	stat	pvalue	padj	Regulation	Chr	Start	End	Strand	GeneSymbol	Description	GO_BP	GO_CC	GO_MF	KO	Pathway
ENSG00000170345	3186	129	2.5	100	2.01	144	2.57	513	8.97	548	9.71	543	9.8	320.7507565	2.004510717	0.112941627	17.74820121	1.78E-70	1.88E-67	Ups	14	75278826	75282230	+	FOS	Fos proto-oncogene%2C AP-1 transcription factor subunit [Source:HGNC Symbol%3BAcc:HGNC:3796]	GO:0007568:aging;GO:0071276:cellular response to cadmium ion;GO:0071277:cellular response to calcium ion;GO:0031668:cellular response to extracellular stimulus;GO:0032870:cellular response to hormone stimulus;GO:0034614:cellular response to reactive oxygen species;GO:0001661:conditioned taste aversion;GO:0006306:DNA methylation;GO:0007565:female pregnancy;GO:0006954:inflammatory response;GO:00073…	GO:0000785:chromatin;GO:0005829:cytosol;GO:0005783:endoplasmic reticulum;GO:0016020:membrane;GO:0043005:neuron projection;GO:0005654:nucleoplasm;GO:0005634:nucleus;GO:0032993:protein-DNA complex;GO:0035976:AP1 complex;	GO:0003682:chromatin binding;GO:0001228:RNA polymerase II transcription regulatory region sequence-specific DNA binding transcription factor activity involved in positive regulation of transcription;GO:0003700:sequence-specific DNA binding transcription factor activity;GO:0000981:sequence-specific DNA binding RNA polymerase II transcription factor activity;GO:0042802:identical protein binding;GO:…	K04379	;ko01522 Endocrine resistance;ko04010 MAPK signaling pathway;ko04024 cAMP signaling pathway;ko04210 Apoptosis;ko04380 Osteoclast differentiation;ko04620 Toll-like receptor signaling pathway;ko04657 IL-17 signaling pathway;ko04658 Th1 and Th2 cell differentiation;ko04659 Th17 cell differentiation;ko04660 T cell receptor signaling pathway;ko04662 B cell receptor signaling pathway;ko04668 TNF signal…
ENSG00000225783	15892	390	1.51	361	1.45	448	1.6	877	3.07	882	3.13	824	2.98	619.1095894	1.005832465	0.074302141	13.53705903	9.45E-42	4.19E-39	Ups	22	26646411	26676475	+	MIAT	myocardial infarction associated transcript [Source:HGNC Symbol%3BAcc:HGNC:33425]	-	-	-	-	-
ENSG00000138759	20323	241	0.73	251	0.79	233	0.65	527	1.44	573	1.59	526	1.49	385.4703865	1.060116821	0.09609332	11.03215942	2.67E-28	7.21E-26	Ups	4	78057323	78544269	+	FRAS1	Fraser extracellular matrix complex subunit 1 [Source:HGNC Symbol%3BAcc:HGNC:19185]	GO:0007154:cell communication;GO:0030326:embryonic limb morphogenesis;GO:0003338:metanephros morphogenesis;GO:0002009:morphogenesis of an epithelium;GO:0015031:protein transport;GO:0060021:palate development;GO:0043588:skin development;	GO:0005604:basement membrane;GO:0016021:integral component of membrane;GO:0005886:plasma membrane;	GO:0005201:extracellular matrix structural constituent;GO:0046872:metal ion binding;	-	-
ENSG00000196611	2738	292	6.57	321	7.49	341	7.08	171	3.48	123	2.54	168	3.53	238.0507	-1.149314792	0.125108404	-9.186551476	4.06E-20	5.32E-18	Down	11	102789401	102798160	-	MMP1	matrix metallopeptidase 1 [Source:HGNC Symbol%3BAcc:HGNC:7155]	GO:0044267:cellular protein metabolic process;GO:0071492:cellular response to UV-A;GO:0030574:collagen catabolic process;GO:0022617:extracellular matrix disassembly;GO:0030198:extracellular matrix organization;GO:0031334:positive regulation of protein complex assembly;GO:0006508:proteolysis;	GO:0031012:extracellular matrix;GO:0005576:extracellular region;	GO:0004175:endopeptidase activity;GO:0004222:metalloendopeptidase activity;GO:0008233:peptidase activity;GO:0004252:serine-type endopeptidase activity;GO:0008270:zinc ion binding;	K01388	;ko03320 PPAR signaling pathway;ko04657 IL-17 signaling pathway;ko04926 Relaxin signaling pathway;ko05171 Coronavirus disease - COVID-19;ko05200 Pathways in cancer;ko05219 Bladder cancer;ko05323 Rheumatoid arthritis;
ENSG00000106772	14683	145	0.61	152	0.66	129	0.5	321	1.22	319	1.23	282	1.1	221.1802821	1.006751654	0.125142689	8.04482993	8.64E-16	8.37E-14	Ups	9	76611376	76906114	-	PRUNE2	prune homolog 2 with BCH domain [Source:HGNC Symbol%3BAcc:HGNC:25209]	GO:0006915:apoptotic process;GO:0006798:polyphosphate catabolic process;	GO:0005737:cytoplasm;	GO:0004309:exopolyphosphatase activity;GO:0046872:metal ion binding;	K18449	-
ENSG00000078018	11813	159	0.83	138	0.75	152	0.73	337	1.59	366	1.75	269	1.31	232.7116613	1.0097874	0.127373848	7.927745084	2.23E-15	2.03E-13	Ups	2	209424047	209734118	+	MAP2	microtubule associated protein 2 [Source:HGNC Symbol%3BAcc:HGNC:6839]	GO:0007409:axonogenesis;GO:0071310:cellular response to organic substance;GO:0021954:central nervous system neuron development;GO:0016358:dendrite development;GO:0048813:dendrite morphogenesis;GO:0030010:establishment of cell polarity;GO:0001578:microtubule bundle formation;GO:0000226:microtubule cytoskeleton organization;GO:0030517:negative regulation of axon extension;GO:0007026:negative regula…	GO:0015629:actin cytoskeleton;GO:0097440:apical dendrite;GO:0030424:axon;GO:0043203:axon hillock;GO:0043194:axon initial segment;GO:0097441:basilar dendrite;GO:0097442:CA3 pyramidal cell dendrite;GO:0044297:cell body;GO:0005737:cytoplasm;GO:0030425:dendrite;GO:0032839:dendrite cytoplasm;GO:0044307:dendritic branch;GO:1902737:dendritic filopodium;GO:0044294:dendritic growth cone;GO:0043198:dendrit…	GO:0003779:actin binding;GO:0005516:calmodulin binding;GO:0002162:dystroglycan binding;GO:0008017:microtubule binding;GO:0019901:protein kinase binding;GO:0005198:structural molecule activity;GO:0048156:tau protein binding;GO:0005519:cytoskeletal regulatory protein binding;	K10430	-
ENSG00000117228	6103	99	1	131	1.37	168	1.56	308	2.81	289	2.67	275	2.59	207.5971007	1.032247565	0.135215682	7.634081716	2.27E-14	1.85E-12	Ups	1	89051882	89065360	-	GBP1	guanylate binding protein 1 [Source:HGNC Symbol%3BAcc:HGNC:4182]	GO:0071346:cellular response to interferon-gamma;GO:0071347:cellular response to interleukin-1;GO:0071356:cellular response to tumor necrosis factor;GO:0051607:defense response to virus;GO:0070373:negative regulation of ERK1 and ERK2 cascade;GO:0032703:negative regulation of interleukin-2 production;GO:1903077:negative regulation of protein localization to plasma membrane;GO:1900025:negative regu…	GO:0015629:actin cytoskeleton;GO:0005737:cytoplasm;GO:0031410:cytoplasmic vesicle;GO:0005829:cytosol;GO:0005576:extracellular region;GO:0005794:Golgi apparatus;GO:0000139:Golgi membrane;GO:0005886:plasma membrane;GO:0012506:vesicle membrane;	GO:0003779:actin binding;GO:0019955:cytokine binding;GO:0019899:enzyme binding;GO:0019003:GDP binding;GO:0005525:GTP binding;GO:0003924:GTPase activity;GO:0051879:Hsp90 protein binding;GO:0042802:identical protein binding;GO:0042803:protein homodimerization activity;GO:0030507:spectrin binding;	-	-
ENSG00000207827	71	0	0	0	0	0	0	67	52.54	64	50.91	45	36.43	28.11908297	8.210623564	1.209390097	6.789061348	1.13E-11	6.90E-10	Ups	6	71403551	71403621	-	MIR30A	microRNA 30a [Source:HGNC Symbol%3BAcc:HGNC:31624]	-	-	-	-	-
ENSG00000178860	2046	52	1.57	44	1.37	55	1.53	113	3.08	146	4.03	145	4.07	90.69176146	1.319672262	0.195436979	6.752418455	1.45E-11	8.74E-10	Ups	8	71841560	71844412	-	MSC	musculin [Source:HGNC Symbol%3BAcc:HGNC:7321]	GO:0014707:branchiomeric skeletal muscle development;GO:0003161:cardiac conduction system development;GO:0032502:developmental process;GO:0060539:diaphragm development;GO:0006357:regulation of transcription from RNA polymerase II promoter;GO:0006355:regulation of transcription, DNA-templated;GO:0060021:palate development;GO:0007519:skeletal muscle tissue development;	GO:0000785:chromatin;GO:0005654:nucleoplasm;GO:0005634:nucleus;	GO:0003700:sequence-specific DNA binding transcription factor activity;GO:0000981:sequence-specific DNA binding RNA polymerase II transcription factor activity;GO:0001227:RNA polymerase II transcription regulatory region sequence-specific DNA binding transcription factor activity involved in negative regulation of transcription;GO:0046983:protein dimerization activity;GO:0000978:RNA polymerase II…	K09072	-
ENSG00000025423	2272	62	1.68	56	1.58	71	1.78	157	3.85	137	3.41	155	3.92	104.2947845	1.147205411	0.174447744	6.576212363	4.83E-11	2.61E-09	Ups	12	56752161	56787790	+	HSD17B6	hydroxysteroid 17-beta dehydrogenase 6 [Source:HGNC Symbol%3BAcc:HGNC:23316]	GO:0006702:androgen biosynthetic process;GO:0006710:androgen catabolic process;	GO:0031901:early endosome membrane;GO:0005783:endoplasmic reticulum;	GO:0044594:17-beta-hydroxysteroid dehydrogenase (NAD+) activity;GO:0072582:17-beta-hydroxysteroid dehydrogenase (NADP+) activity;GO:0047024:5alpha-androstane-3beta,17beta-diol dehydrogenase activity;GO:0047044:androstan-3-alpha,17-beta-diol dehydrogenase activity;GO:0047023:androsterone dehydrogenase activity;GO:0003824:catalytic activity;GO:0009055:electron carrier activity;GO:0004745:retinol de…	K13369	;ko00140 Steroid hormone biosynthesis;ko00830 Retinol metabolism;ko01100 Metabolic pathways;ko01240 Biosynthesis of cofactors;
ENSG00000149948	15070	114	0.47	127	0.54	123	0.46	46	0.17	54	0.2	68	0.26	89.70071639	-1.219007495	0.194170389	-6.278029828	3.43E-10	1.70E-08	Down	12	65824460	65966291	+	HMGA2	high mobility group AT-hook 2 [Source:HGNC Symbol%3BAcc:HGNC:5009]	-	-	-	K09283	;ko05202 Transcriptional misregulation in cancer;ko05206 MicroRNAs in cancer;
ENSG00000127863	5113	67	0.81	77	0.96	82	0.91	185	2.01	171	1.89	139	1.56	117.9895992	1.026997748	0.167681193	6.124704448	9.09E-10	4.11E-08	Ups	13	23570370	23676104	+	TNFRSF19	TNF receptor superfamily member 19 [Source:HGNC Symbol%3BAcc:HGNC:11915]	GO:0006915:apoptotic process;GO:0001942:hair follicle development;GO:0007254:JNK cascade;GO:0043123:positive regulation of I-kappaB kinase/NF-kappaB signaling;GO:0046330:positive regulation of JNK cascade;	GO:0016021:integral component of membrane;GO:0005886:plasma membrane;	GO:0038023:signaling receptor activity;GO:0005031:tumor necrosis factor-activated receptor activity;	K05155	;ko04060 Cytokine-cytokine receptor interaction;
ENSG00000104081	5447	75	0.85	70	0.82	70	0.73	173	1.77	154	1.6	144	1.52	112.3958237	1.026216782	0.167556563	6.12459915	9.09E-10	4.11E-08	Ups	15	40087890	40108892	-	BMF	Bcl2 modifying factor [Source:HGNC Symbol%3BAcc:HGNC:24132]	GO:0043276:anoikis;GO:0034644:cellular response to UV;GO:0010507:negative regulation of autophagy;GO:0043065:positive regulation of apoptotic process;GO:0031334:positive regulation of protein complex assembly;GO:0090200:positive regulation of release of cytochrome c from mitochondria;	GO:0001669:acrosomal vesicle;GO:0005829:cytosol;GO:0005741:mitochondrial outer membrane;GO:0016459:myosin complex;GO:0005886:plasma membrane;	-	K17460	;ko05206 MicroRNAs in cancer;
ENSG00000166396	2637	134	3.13	134	3.25	143	3.08	70	1.48	70	1.5	76	1.66	105.322418	-1.031194354	0.169785872	-6.073499167	1.25E-09	5.59E-08	Down	18	63752935	63805376	+	SERPINB7	serpin family B member 7 [Source:HGNC Symbol%3BAcc:HGNC:13902]	GO:0010951:negative regulation of endopeptidase activity;GO:0032967:positive regulation of collagen biosynthetic process;GO:0072126:positive regulation of glomerular mesangial cell proliferation;GO:0090362:positive regulation of platelet-derived growth factor production;GO:0032914:positive regulation of transforming growth factor beta1 production;	GO:0005737:cytoplasm;GO:0005615:extracellular space;	GO:0004867:serine-type endopeptidase inhibitor activity;	K13964	-
ENSG00000212724	875	91	6.41	72	5.26	87	5.65	36	2.29	35	2.26	33	2.17	59.59933555	-1.367834443	0.23208862	-5.893586862	3.78E-09	1.55E-07	Down	17	41059240	41060114	-	KRTAP2-3	keratin associated protein 2-3 [Source:HGNC Symbol%3BAcc:HGNC:18906]	-	GO:0005829:cytosol;GO:0045095:keratin filament;	-	-	-
ENSG00000125740	5553	13	0.14	12	0.14	10	0.1	62	0.62	45	0.46	49	0.51	30.99811431	2.049186622	0.353633719	5.794658463	6.85E-09	2.65E-07	Ups	19	45467995	45475179	+	FOSB	FosB proto-oncogene%2C AP-1 transcription factor subunit [Source:HGNC Symbol%3BAcc:HGNC:3797]	GO:0071277:cellular response to calcium ion;GO:0032870:cellular response to hormone stimulus;GO:0007565:female pregnancy;GO:0000122:negative regulation of transcription from RNA polymerase II promoter;GO:0006357:regulation of transcription from RNA polymerase II promoter;GO:0051591:response to cAMP;GO:0051412:response to corticosterone;GO:0042493:response to drug;GO:0009612:response to mechanical…	GO:0000785:chromatin;GO:0043231:intracellular membrane-bounded organelle;GO:0005654:nucleoplasm;GO:0005634:nucleus;	GO:0003677:DNA binding;GO:0001228:RNA polymerase II transcription regulatory region sequence-specific DNA binding transcription factor activity involved in positive regulation of transcription;GO:0000981:sequence-specific DNA binding RNA polymerase II transcription factor activity;GO:0000978:RNA polymerase II core promoter proximal region sequence-specific DNA binding;GO:0008134:transcription fac…	K09029	;ko04380 Osteoclast differentiation;ko04657 IL-17 signaling pathway;ko05030 Cocaine addiction;ko05031 Amphetamine addiction;ko05034 Alcoholism;
ENSG00000212901	739	54	4.5	54	4.67	93	7.15	24	1.81	22	1.68	31	2.41	46.52933896	-1.47537626	0.281496639	-5.24118606	1.60E-07	4.79E-06	Down	17	41008521	41019324	-	KRTAP3-1	keratin associated protein 3-1 [Source:HGNC Symbol%3BAcc:HGNC:16778]	-	GO:0005829:cytosol;GO:0045095:keratin filament;	GO:0005198:structural molecule activity;	K17429	-
ENSG00000205670	7896	11	0.09	11	0.09	11	0.08	71	0.5	26	0.19	50	0.36	29.162007	2.048597611	0.39937378	5.129524554	2.90E-07	8.28E-06	Ups	21	34375480	34416961	+	SMIM11	small integral membrane protein 11 [Source:HGNC Symbol%3BAcc:HGNC:1293]	-	GO:0016021:integral component of membrane;	-	K12581;K02927	;ko03018 RNA degradation;;ko03010 Ribosome;ko04120 Ubiquitin mediated proteolysis;ko04137 Mitophagy - animal;ko05012 Parkinson disease;ko05022 Pathways of neurodegeneration - multiple diseases;ko05131 Shigellosis;ko05167 Kaposi sarcoma-associated herpesvirus infection;ko05171 Coronavirus disease - COVID-19;
ENSG00000155792	2627	64	1.5	43	1.05	45	0.97	104	2.2	127	2.73	106	2.32	80.19154401	1.04380473	0.206941849	5.043951882	4.56E-07	1.23E-05	Ups	8	119873717	120050918	+	DEPTOR	DEP domain containing MTOR interacting protein [Source:HGNC Symbol%3BAcc:HGNC:22953]	GO:0035556:intracellular signal transduction;GO:0045792:negative regulation of cell size;GO:0006469:negative regulation of protein kinase activity;GO:0032007:negative regulation of TOR signaling;GO:1904262:negative regulation of TORC1 signaling;GO:1903940:negative regulation of TORC2 signaling;GO:2001236:regulation of extrinsic apoptotic signaling pathway;	-	-	-	-
ENSG00000268879	360	17	2.91	17	3.02	17	2.68	60	9.28	56	8.79	41	6.55	33.87376296	1.516461091	0.318937743	4.754724473	1.99E-06	4.59E-05	Ups	19	46196238	46197323	+	IGFL1P1	IGF like family member 1 pseudogene 1 [Source:HGNC Symbol%3BAcc:HGNC:32956]	-	-	-	-	-
ENSG00000133106	4924	25	0.31	24	0.31	34	0.39	60	0.68	71	0.81	67	0.78	45.91192281	1.155690351	0.263146287	4.391817057	1.12E-05	0.000210439	Ups	13	42886388	42992271	-	EPSTI1	epithelial stromal interaction 1 [Source:HGNC Symbol%3BAcc:HGNC:16465]	-	-	-	-	-
ENSG00000163814	6508	46	0.44	36	0.35	69	0.6	23	0.2	20	0.17	20	0.18	35.73993771	-1.353553702	0.310858996	-4.354236878	1.34E-05	0.000243686	Down	3	45082277	45146422	-	CDCP1	CUB domain containing protein 1 [Source:HGNC Symbol%3BAcc:HGNC:24357]	-	GO:0005576:extracellular region;GO:0016021:integral component of membrane;GO:0005886:plasma membrane;	-	K06732	-
ENSG00000038295	8105	22	0.17	27	0.21	26	0.18	53	0.36	70	0.49	57	0.4	41.75639358	1.15960203	0.278490362	4.163885673	3.13E-05	0.000510698	Ups	4	165873237	166104457	+	TLL1	tolloid like 1 [Source:HGNC Symbol%3BAcc:HGNC:11843]	GO:0030154:cell differentiation;GO:0030199:collagen fibril organization;GO:0001501:skeletal system development;	GO:0005576:extracellular region;	GO:0005509:calcium ion binding;GO:0005518:collagen binding;GO:0004222:metalloendopeptidase activity;GO:0008270:zinc ion binding;GO:0004252:serine-type endopeptidase activity;	K09608	-
ENSG00000173926	4929	68	0.85	60	0.78	53	0.61	30	0.34	29	0.33	37	0.43	46.68437915	-1.021752237	0.261987592	-3.900002394	9.62E-05	0.001340254	Down	5	126867714	127030558	-	MARCHF3	membrane associated ring-CH-type finger 3 [Source:HGNC Symbol%3BAcc:HGNC:28728]	GO:0006897:endocytosis;GO:0016567:protein ubiquitination;	GO:0031901:early endosome membrane;GO:0005768:endosome;GO:0016021:integral component of membrane;GO:0043231:intracellular membrane-bounded organelle;GO:0005764:lysosome;	GO:0004842:ubiquitin-protein transferase activity;GO:0008270:zinc ion binding;	K10658	-
ENSG00000121871	5274	13	0.15	9	0.11	14	0.15	36	0.38	43	0.46	28	0.31	23.26642459	1.47081273	0.385204645	3.818263223	0.000134394	0.001793665	Ups	3	165186720	165197109	-	SLITRK3	SLIT and NTRK like family member 3 [Source:HGNC Symbol%3BAcc:HGNC:23501]	GO:0007409:axonogenesis;GO:0051965:positive regulation of synapse assembly;	GO:0005886:plasma membrane;	-	-	-
ENSG00000174827	2480	27	0.67	17	0.44	17	0.39	51	1.15	50	1.14	45	1.04	33.89825337	1.152868916	0.310479044	3.71319398	0.00020466	0.002548525	Ups	1	145670852	145708148	-	PDZK1	PDZ domain containing 1 [Source:HGNC Symbol%3BAcc:HGNC:8821]	GO:0015879:carnitine transport;GO:1904064:positive regulation of cation transmembrane transport;GO:0032414:positive regulation of ion transmembrane transporter activity;GO:0090314:positive regulation of protein targeting to membrane;GO:0072659:protein localization to plasma membrane;GO:0044070:regulation of anion transport;	GO:0016324:apical plasma membrane;GO:0005903:brush border;GO:0031526:brush border membrane;GO:0070062:extracellular exosome;GO:0045121:membrane raft;GO:0031528:microvillus membrane;GO:0005886:plasma membrane;	GO:0030165:PDZ domain binding;GO:0044877:macromolecular complex binding;GO:0043495:protein anchor;GO:0005124:scavenger receptor binding;	K12581	;ko03018 RNA degradation;
ENSG00000100767	7699	20	0.16	35	0.29	23	0.17	52	0.38	62	0.45	61	0.46	41.58871198	1.057789894	0.285317328	3.707415537	0.000209385	0.002597937	Ups	14	73237497	73274640	+	PAPLN	papilin%2C proteoglycan like sulfated glycoprotein [Source:HGNC Symbol%3BAcc:HGNC:19262]	GO:0030198:extracellular matrix organization;	GO:0031012:extracellular matrix;GO:0005576:extracellular region;	GO:0004222:metalloendopeptidase activity;GO:0004867:serine-type endopeptidase inhibitor activity;	K11447;K12581	;ko05202 Transcriptional misregulation in cancer;;ko03018 RNA degradation;
ENSG00000136275	808	21	1.6	18	1.42	14	0.98	33	2.27	55	3.84	41	2.92	29.86683894	1.176486179	0.341208358	3.447999296	0.000564756	0.005900559	Ups	7	47795291	47819847	+	PKD1L1-AS1	PKD1L1 antisense RNA 1 [Source:HGNC Symbol%3BAcc:HGNC:21911]	-	-	-	-	-
ENSG00000151067	25552	21	0.05	17	0.04	25	0.06	34	0.07	48	0.11	62	0.14	33.9089558	1.096892803	0.321482828	3.411979446	0.00064493	0.006558931	Ups	12	1970772	2697950	+	CACNA1C	calcium voltage-gated channel subunit alpha1 C [Source:HGNC Symbol%3BAcc:HGNC:1390]	GO:0070509:calcium ion import;GO:0070588:calcium ion transmembrane transport;GO:0061577:generation of L-type calcium current;GO:0006816:calcium ion transport;GO:0060402:calcium ion transport into cytosol;GO:0035585:calcium-mediated signaling using extracellular calcium source;GO:0043010:camera-type eye development;GO:0061337:cardiac conduction;GO:0086002:cardiac muscle cell action potential invol…	GO:0005737:cytoplasm;GO:0030425:dendrite;GO:0016021:integral component of membrane;GO:0005887:integral component of plasma membrane;GO:1990454:L-type voltage-gated calcium channel complex;GO:0043204:perikaryon;GO:0005886:plasma membrane;GO:0014069:postsynaptic density;GO:0005891:voltage-gated calcium channel complex;GO:0030018:Z disc;GO:0042383:sarcolemma;GO:0030315:T-tubule;GO:0002095:caveolar m…	GO:0051393:alpha-actinin binding;GO:0005516:calmodulin binding;GO:0008331:high voltage-gated calcium channel activity;GO:0046872:metal ion binding;GO:0005245:voltage-gated calcium channel activity;GO:0086056:voltage-gated calcium channel activity involved in AV node cell action potential;GO:0086007:voltage-gated calcium channel activity involved in cardiac muscle cell action potential;GO:0019899:…	K04850	;ko04010 MAPK signaling pathway;ko04020 Calcium signaling pathway;ko04022 cGMP-PKG signaling pathway;ko04024 cAMP signaling pathway;ko04260 Cardiac muscle contraction;ko04261 Adrenergic signaling in cardiomyocytes;ko04270 Vascular smooth muscle contraction;ko04713 Circadian entrainment;ko04720 Long-term potentiation;ko04723 Retrograde endocannabinoid signaling;ko04724 Glutamatergic synapse;ko0472…
ENSG00000285108	10728	51	0.29	31	0.18	40	0.21	19	0.1	10	0.05	28	0.15	30.12169583	-1.19855426	0.353043382	-3.394920628	0.000686485	0.006874842	Down	8	129685401	129723023	-	-	novel transcript	-	-	-	-	-
ENSG00000168961	5714	20	0.22	15	0.17	12	0.12	45	0.44	33	0.33	36	0.36	26.37481869	1.169312443	0.354696314	3.296658001	0.000978426	0.009169565	Ups	17	27629798	27649560	+	LGALS9	galectin 9 [Source:HGNC Symbol%3BAcc:HGNC:6570]	GO:0071346:cellular response to interferon-gamma;GO:0098586:cellular response to virus;GO:0006935:chemotaxis;GO:0070371:ERK1 and ERK2 cascade;GO:0007565:female pregnancy;GO:0006954:inflammatory response;GO:0060135:maternal process involved in female pregnancy;GO:0002519:natural killer cell tolerance induction;GO:0046007:negative regulation of activated T cell proliferation;GO:2000562:negative reg…	GO:0005737:cytoplasm;GO:0005829:cytosol;GO:0005615:extracellular space;GO:0005634:nucleus;	GO:0030246:carbohydrate binding;GO:0048030:disaccharide binding;GO:0019899:enzyme binding;GO:0005534:galactose binding;GO:0016936:galactoside binding;	K10093	-
ENSG00000156466	3712	16	0.27	15	0.26	40	0.61	52	0.78	45	0.68	59	0.91	36.94219501	1.049588748	0.319636638	3.28369349	0.001024563	0.00955148	Ups	8	96142333	96160806	-	GDF6	growth differentiation factor 6 [Source:HGNC Symbol%3BAcc:HGNC:4221]	GO:0032924:activin receptor signaling pathway;GO:0006915:apoptotic process;GO:0030509:BMP signaling pathway;GO:0045444:fat cell differentiation;GO:0001656:metanephros development;GO:0060389:pathway-restricted SMAD protein phosphorylation;GO:0032332:positive regulation of chondrocyte differentiation;GO:1900745:positive regulation of p38MAPK cascade;GO:0010862:positive regulation of pathway-restric…	GO:0005615:extracellular space;	GO:0005125:cytokine activity;GO:0008083:growth factor activity;	K04664	;ko04060 Cytokine-cytokine receptor interaction;ko04350 TGF-beta signaling pathway;ko04390 Hippo signaling pathway;
ENSG00000162772	4040	26	0.4	13	0.21	17	0.24	46	0.63	45	0.63	37	0.53	30.10723638	1.088190922	0.332191375	3.275795235	0.001053649	0.009769686	Ups	1	212565334	212620777	+	ATF3	activating transcription factor 3 [Source:HGNC Symbol%3BAcc:HGNC:785]	GO:0034198:cellular response to amino acid starvation;GO:0030968:endoplasmic reticulum unfolded protein response;GO:0006094:gluconeogenesis;GO:0070373:negative regulation of ERK1 and ERK2 cascade;GO:0000122:negative regulation of transcription from RNA polymerase II promoter;GO:0008284:positive regulation of cell proliferation;GO:0010628:positive regulation of gene expression;GO:1903984:positive …	GO:1990622:CHOP-ATF3 complex;GO:0000785:chromatin;GO:0005730:nucleolus;GO:0005654:nucleoplasm;GO:0005634:nucleus;	GO:0001228:RNA polymerase II transcription regulatory region sequence-specific DNA binding transcription factor activity involved in positive regulation of transcription;GO:0003700:sequence-specific DNA binding transcription factor activity;GO:0000981:sequence-specific DNA binding RNA polymerase II transcription factor activity;GO:0001227:RNA polymerase II transcription regulatory region sequence…	K09032	-
ENSG00000137959	11610	25	0.13	21	0.12	10	0.05	53	0.25	37	0.18	42	0.21	30.89298695	1.121495734	0.343161816	3.268125075	0.001082625	0.009984532	Ups	1	78619902	78646145	+	IFI44L	interferon induced protein 44 like [Source:HGNC Symbol%3BAcc:HGNC:17817]	GO:0051607:defense response to virus;GO:0006955:immune response;	GO:0005737:cytoplasm;	GO:0005525:GTP binding;	K17347	-
ENSG00000131737	1635	49	1.85	25	0.98	40	1.39	21	0.72	19	0.66	19	0.67	28.97355048	-1.050325573	0.339221036	-3.096286676	0.001959608	0.016117279	Down	17	41377669	41382306	-	KRT34	keratin 34 [Source:HGNC Symbol%3BAcc:HGNC:6452]	-	GO:0005829:cytosol;GO:0005615:extracellular space;GO:0005882:intermediate filament;	GO:0005198:structural molecule activity;	K07604	;ko04915 Estrogen signaling pathway;ko05150 Staphylococcus aureus infection;
ENSG00000116032	3281	11	0.21	14	0.27	15	0.26	29	0.49	37	0.64	30	0.53	22.24802884	1.161052049	0.379730225	3.057570799	0.002231389	0.017809696	Ups	19	1000419	1009732	+	GRIN3B	glutamate ionotropic receptor NMDA type subunit 3B [Source:HGNC Symbol%3BAcc:HGNC:16768]	GO:0035235:ionotropic glutamate receptor signaling pathway;GO:0051205:protein insertion into membrane;GO:0051924:regulation of calcium ion transport;	GO:0043025:neuronal cell body;GO:0017146:N-methyl-D-aspartate selective glutamate receptor complex;GO:0005886:plasma membrane;GO:0045211:postsynaptic membrane;	GO:0005262:calcium channel activity;GO:0005261:cation channel activity;GO:0016594:glycine binding;GO:0004970:ionotropic glutamate receptor activity;GO:0015276:ligand-gated ion channel activity;GO:0042165:neurotransmitter binding;GO:0030594:neurotransmitter receptor activity;GO:0038023:signaling receptor activity;	K05214	;ko04024 cAMP signaling pathway;ko04080 Neuroactive ligand-receptor interaction;ko04724 Glutamatergic synapse;ko05017 Spinocerebellar ataxia;ko05020 Prion disease;ko05030 Cocaine addiction;ko05031 Amphetamine addiction;ko05033 Nicotine addiction;ko05034 Alcoholism;
ENSG00000168646	5197	26	0.31	10	0.12	20	0.22	46	0.49	43	0.47	32	0.35	28.91000962	1.010612421	0.346170985	2.919402445	0.003507031	0.025605753	Ups	17	65528563	65561648	-	AXIN2	axin 2 [Source:HGNC Symbol%3BAcc:HGNC:904]	GO:0030282:bone mineralization;GO:0008283:cell proliferation;GO:0034613:cellular protein localization;GO:0003413:chondrocyte differentiation involved in endochondral bone morphogenesis;GO:0001957:intramembranous ossification;GO:0043570:maintenance of DNA repeat elements;GO:0048255:mRNA stabilization;GO:0090090:negative regulation of canonical Wnt signaling pathway;GO:0008285:negative regulation o…	GO:0030877:beta-catenin destruction complex;GO:0005813:centrosome;GO:0005737:cytoplasm;GO:0005829:cytosol;GO:0005634:nucleus;	GO:0008013:beta-catenin binding;GO:0019899:enzyme binding;GO:0070411:I-SMAD binding;GO:0031625:ubiquitin protein ligase binding;	K04385	;ko04310 Wnt signaling pathway;ko04390 Hippo signaling pathway;ko04550 Signaling pathways regulating pluripotency of stem cells;ko04934 Cushing syndrome;ko05010 Alzheimer disease;ko05022 Pathways of neurodegeneration - multiple diseases;ko05165 Human papillomavirus infection;ko05200 Pathways in cancer;ko05210 Colorectal cancer;ko05213 Endometrial cancer;ko05217 Basal cell carcinoma;ko05224 Breast…
ENSG00000277702	213	51	14.76	31	9.3	26	6.94	25	6.54	20	5.3	13	3.51	27.97506733	-1.010413969	0.36260774	-2.786520689	0.005327722	0.035686026	Down	1	143419625	143420207	-	-	lymphocyte-specific protein 1 (LSP1) pseudogene	GO:0006968:cellular defense response;GO:0098761:cellular response to interleukin-7;GO:0006935:chemotaxis;GO:0007165:signal transduction;	GO:0015629:actin cytoskeleton;GO:0070062:extracellular exosome;GO:0016020:membrane;GO:0005886:plasma membrane;	GO:0003779:actin binding;	K14957	;ko04625 C-type lectin receptor signaling pathway;ko05152 Tuberculosis;
ENSG00000198768	4210	15	0.22	15	0.23	16	0.22	30	0.4	36	0.48	33	0.45	23.77558321	1.003218938	0.36052838	2.782635139	0.00539194	0.035981135	Ups	20	58459101	58515399	-	APCDD1L	APC down-regulated 1 like [Source:HGNC Symbol%3BAcc:HGNC:26892]	GO:0030178:negative regulation of Wnt signaling pathway;	GO:0016021:integral component of membrane;GO:0005886:plasma membrane;	GO:0017147:Wnt-protein binding;	-	-
ENSG00000271605	1816	28	0.95	36	1.27	22	0.69	14	0.43	13	0.4	17	0.54	22.01631904	-1.079553997	0.388676624	-2.777512027	0.005477681	0.036394444	Down	17	64449037	64468643	+	MILR1	mast cell immunoglobulin like receptor 1 [Source:HGNC Symbol%3BAcc:HGNC:27570]	GO:0007166:cell surface receptor signaling pathway;GO:0098742:cell-cell adhesion via plasma-membrane adhesion molecules;GO:0043303:mast cell degranulation;GO:0033004:negative regulation of mast cell activation;	GO:0005887:integral component of plasma membrane;	GO:0004888:transmembrane signaling receptor activity;	K02927;K17985	;ko03010 Ribosome;ko04120 Ubiquitin mediated proteolysis;ko04137 Mitophagy - animal;ko05012 Parkinson disease;ko05022 Pathways of neurodegeneration - multiple diseases;ko05131 Shigellosis;ko05167 Kaposi sarcoma-associated herpesvirus infection;ko05171 Coronavirus disease - COVID-19;;ko04137 Mitophagy - animal;ko04140 Autophagy - animal;ko05010 Alzheimer disease;ko05014 Amyotrophic lateral scleros…
ENSG00000148488	7063	16	0.14	11	0.1	15	0.12	28	0.22	37	0.3	28	0.23	22.09545283	1.045715134	0.379806197	2.75328613	0.005900031	0.038512533	Ups	10	17315421	17454595	-	ST8SIA6	ST8 alpha-N-acetyl-neuraminide alpha-2%2C8-sialyltransferase 6 [Source:HGNC Symbol%3BAcc:HGNC:23317]	GO:0001835:blastocyst hatching;GO:0016051:carbohydrate biosynthetic process;GO:0001574:ganglioside biosynthetic process;GO:0009247:glycolipid biosynthetic process;GO:0009100:glycoprotein metabolic process;GO:0006491:N-glycan processing;GO:0009311:oligosaccharide metabolic process;GO:0006486:protein glycosylation;GO:0006493:protein O-linked glycosylation;	GO:0000139:Golgi membrane;GO:0016021:integral component of membrane;	GO:0003828:alpha-N-acetylneuraminate alpha-2,8-sialyltransferase activity;GO:0008373:sialyltransferase activity;	K06615	-
ENSG00000278771	299	72	14.84	39	8.34	4	0.76	4	0.74	8	1.51	5	0.96	23.03850742	-2.897225815	1.095288703	-2.64517091	0.008164967	0.049211537	Down	14	49853616	49853914	-	RN7SL3	RNA component of signal recognition particle 7SL3 [Source:HGNC Symbol%3BAcc:HGNC:23135]	-	-	-	-	-
